# Supplementary material for: Projected future changes in extreme precipitation over China under stratospheric aerosol intervention
Source: Copernicus journal article supplement (doi:10.5194/egusphere-2023-2904), 2024-01-09
Supplement: Supplementary file 1 [file egusphere-2023-2904-supplement.pdf]

# Projected future changes in extreme precipitation over China under stratospheric aerosol intervention

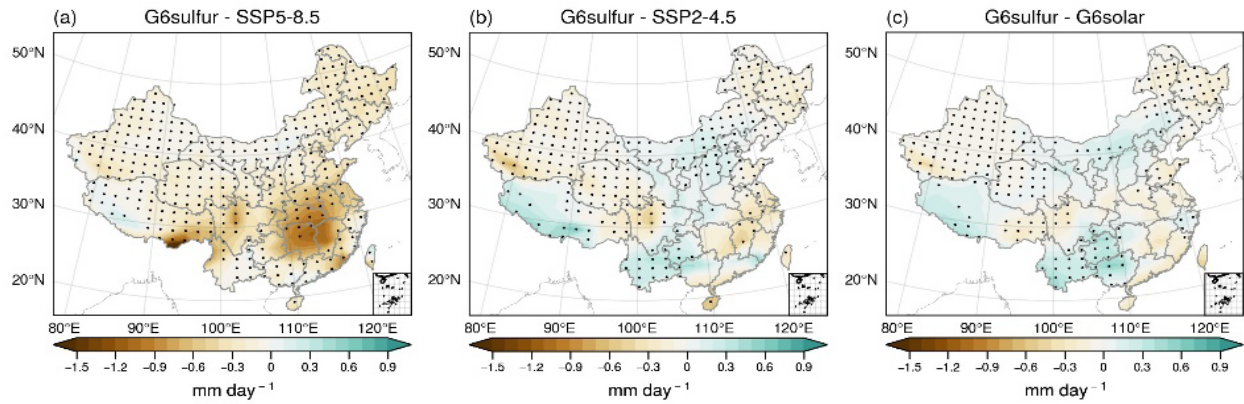

5

Figure S1. Differences in precipitation ( $\text{mm day}^{-1}$ ) for the future period of 2071 – 2100 between G6sulfur and SSP5-8.5 (a), SSP2-4.5 (b), and G6solar (c). The dotted areas indicate where the difference is statistically significant at a 95% confidence level using a Wilcoxon rank sum test.

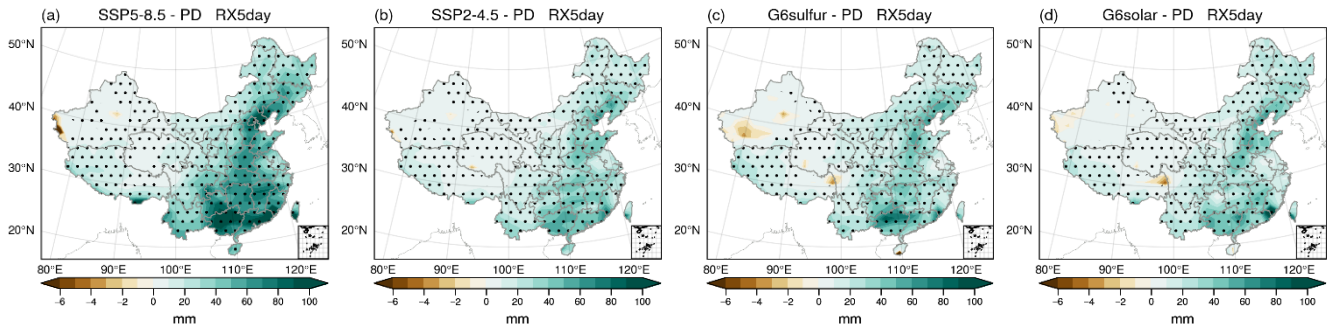

10

Figure S2. Absolute changes in RX5Day for the future period of 2071 – 2100 relative to the PD. The dotted areas indicate where the difference is statistically significant at a 95% confidence level using a Wilcoxon rank sum test.

15

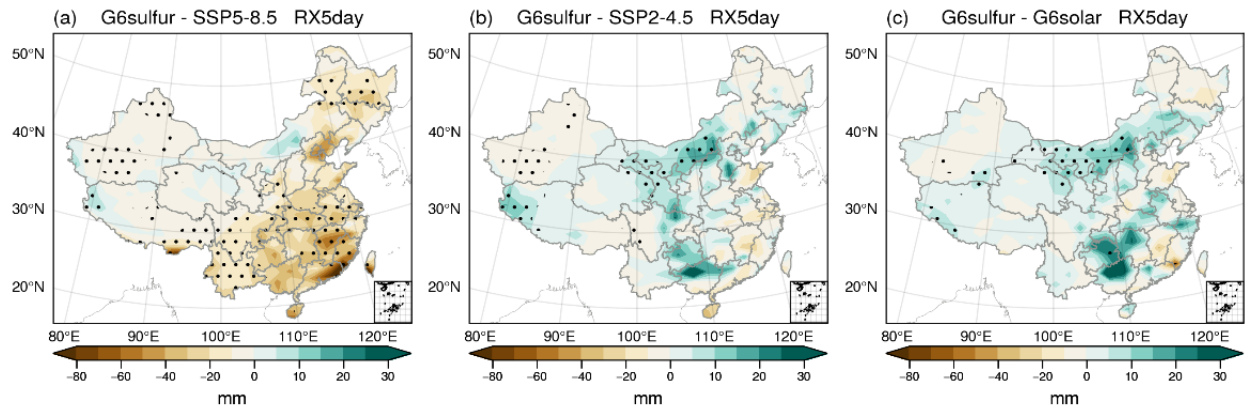

Figure S3. Differences in RX5day for the future period of 2071 – 2100 between G6sulfur and SSP5-8.5 (a), SSP2-4.5 (b), and G6solar (c). The dotted areas indicate where the difference is statistically significant at a 95% confidence level

20 using a Wilcoxon rank sum test.

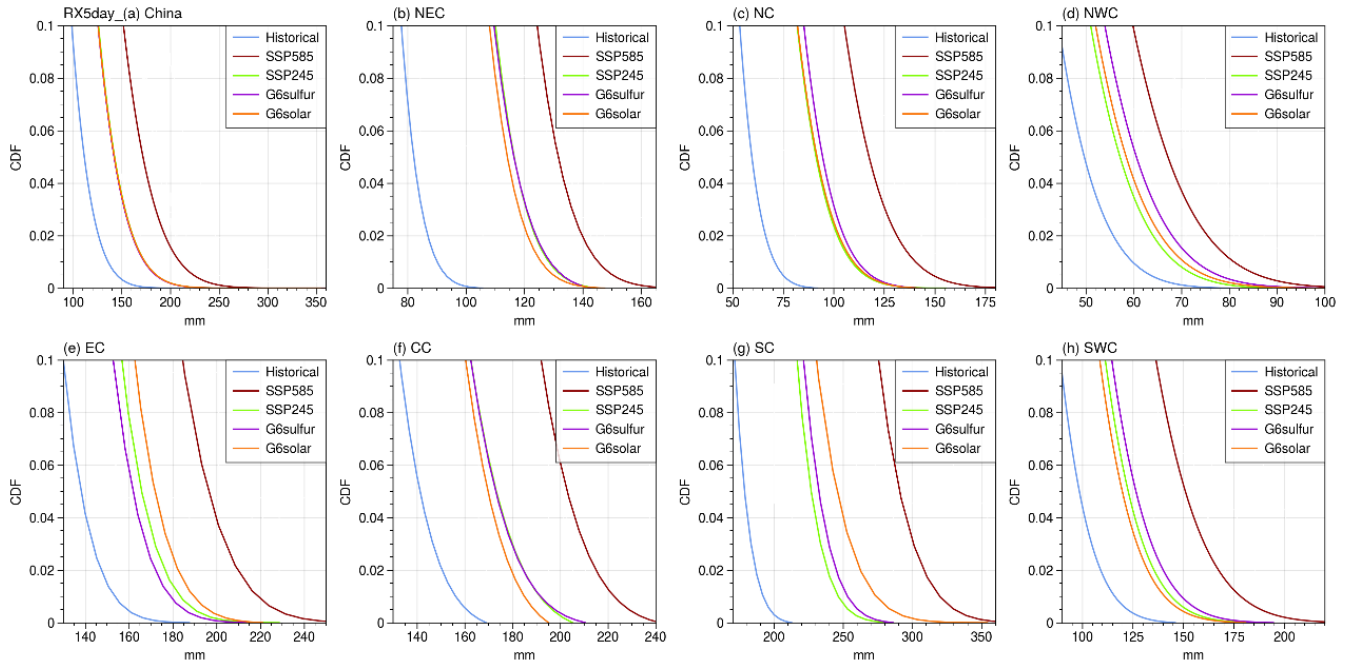

Figure S4. Cumulative distribution functions of RX5day in China and 7 subregions.

25

**Table S1: Amelioration effect of G6solar in comparison to SSP5-8.5.**

|               | <b>China</b> | <b>NEC</b> | <b>NC</b> | <b>NWC</b> | <b>EC</b> | <b>CC</b> | <b>SC</b> | <b>SWC</b> |
|---------------|--------------|------------|-----------|------------|-----------|-----------|-----------|------------|
| <b>RX1day</b> | -            | +          | -         | +          | +         | +         | -         | +          |
| <b>RX5day</b> | +            | +          | +         | +          | +         | +         | +         | +          |
| <b>R50mm</b>  | +            | +          | +         | <b>0</b>   | +         | +         | +         | +          |
| <b>CWD</b>    | +            | +          | +         | +          | -         | -         | +         | +          |
| <b>R95p</b>   | +            | +          | +         | +          | +         | +         | +         | +          |
| <b>DD</b>     | -            | -          | -         | -          | -         | -         | +         | -          |
| <b>CDD</b>    | -            | -          | -         | -          | +         | +         | +         | -          |
